# Supplementary material for: Morphometric analysis of lungfish endocasts elucidates early dipnoan palaeoneurological evolution
Source: eLife. 2022 Jul 12;11:e73461. doi: 10.7554/eLife.73461 (PMC9275822; doi:10.7554/eLife.73461)
Supplement: Source data 1. [file elife-73461-data1.xlsx]

## Sheet: ENDOCAST MATRIX
	nasal capsules length	olfactory canals length	n.II _ olf. bifurcation	HF _ n.II	n.V _ HF	n.X _ n.V	height SCC	length SCC	width SCC (1 side)	utriculus height	utriculus length	sacculus height	sacculus length	depth hypophys. fossa	depth at n.II	depth at n.V	Angle of bifurcation (olf)	To normalise
TAXA	NAS_CAP_L	OLF_CAN_L	NII_ OLF_BIF	HF_NII	NV_HF	NX_NV	SCC_H	SCC_L	SCC_W	UTR_H	UTR_L	SAC_H	SAC_L	DEP_HYP_F	D_NII	D_NV	ANG_OLF	NOR_COEF
Chirodipterus_australis_P56035	7.58	3.75	5.85	3.61	3.75	18.18	6.33	13.9	13.36	1.7	3.34	5.47		7.53	6.39	5.61	44.44	2.1729
Chirodipterus_australis_P56038	10.93	8.37	7.78	6.11	1.97	20.09	7.18	15.59	15.14	2.2	5.03	6.62	7.98	9.54	7.54	7.1	35.16	1.91744
Dipnorhynchus_sussmilchi	36.35	10.65	10.96	10.81	14.51				29.03	5.92	6.71			31	14.58	15.75	27.66	1
Dipterus_valenciennesi_NMS	13.86	9.37	4.16	7.1	5.8	15.04			13.8								13.78	2.10362
Dipterus_valenciennesi_BMNH	4.7	6.91	5.67	2.98	3.88	19.77	6.46	16.7	16.8	3.74	6.22	7.05	13.67	9.11	5.85	5.43	19.89	1,72797619047619‬
Gogodipterus_paddyensis						31.07	12.81	22.18	20.64	3.94	7.31							1,406492248062016‬
Griphognathus_whitei	35.9	59.54	14.16	9.4			12.45	22.49	16.58	6.23	14.15						12.23	1,750904704463209‬
Iowadipterus_halli	22.85	4.5	18.21			29.17	13.76	21.78	17.62	6.78	6.91	9.38	19.44		21.05	16.06	60.87	1.64756
Orlovichthys_limnatis		2.57	13.67	6.78	4.62	13.54	6.65	13.46	9.17	3.3	7.25				7.09	7.89	42.37	3,165757906215921‬
Pillararhynchus_longi	6.78	5.83	4.17	4.03	4.31	9.81	5.84	8.65	10.14	2.14	3.12			6	6.34	4.44	37.7	2,862919132149901‬
Rhinodipterus_kimberleyensis		6.77	7.03	2.8	4.49	13.55	5.66	11	10.81	3.64	5.75	6.34	10.83	11.18	7.62	11.28	7.03	2,685476410730805‬
Rhinodipterus_ulrichi		7.65	8.7	2.74	5.67	14.6			5.28					12.48	7.36	7.55		5.49811
Youngolepis_praecursor	3.43	3.26	1.52	2.18	3.26	8.41	3.37	6.45	5.54			2.94	5.3	5.44	3.26	3.46	22.01	5,240072202166065‬
Neoceratodus_forsteri	-	14.69	11.69	5.84	8.46	21.7	10.38	21.4	21.22	10.06	11.9	10.07	14.44	16.68	15.79	12.52	16.03
Protopterus_aethiopicus						8.44	3.67	7.65	9.39	5.03	6.29	4.38	5.49
Maximize number of variables
	OLF_CAN_L	NII_ OLF_BIF	NX_NV	SCC_H	SCC_L	SCC_W	UTR_H	UTR_L	SAC_H	D_NII	D_NV	ANG_OLF
Chirodipterus_australis_P56035	3.75	5.85	18.18	6.33	13.9	13.36	1.7	3.34	5.47	6.39	5.61	44.44
Chirodipterus_australis_P56038	8.37	7.78	20.09	7.18	15.59	15.14	2.2	5.03	6.62	7.54	7.1	35.16
Dipterus_valenciennesi_BMNH	6.91	5.67	19.77	6.46	16.7	16.8	3.74	6.22	7.05	5.85	5.43	19.89
Iowadipterus_halli	4.5	18.21	29.17	13.76	21.78	17.62	6.78	6.91	9.38	21.05	16.06	60.87
Rhinodipterus_kimberleyensis	6.77	7.03	13.55	5.66	11	10.81	3.64	5.75	6.34	7.62	11.28	7.03
Maximize number of taxa
	OLF_CAN_L	NII_ OLF_BIF	NX_NV	SCC_H	SCC_L	SCC_W	D_NII	D_NV	ANG_OLF
Chirodipterus_australis_P56035	3.75	5.85	18.18	6.33	13.9	13.36	6.39	5.61	44.44
Chirodipterus_australis_P56038	8.37	7.78	20.09	7.18	15.59	15.14	7.54	7.1	35.16
Dipterus_valenciennesi_BMNH	6.91	5.67	19.77	6.46	16.7	16.8	5.85	5.43	19.89
Iowadipterus_halli	4.5	18.21	29.17	13.76	21.78	17.62	21.05	16.06	60.87
Orlovichthys_limnatis	2.57	13.67	13.54	6.65	13.46	9.17	7.09	7.89	42.37
Pillararhynchus_longi	5.83	4.17	9.81	5.84	8.65	10.14	6.34	4.44	37.7
Rhinodipterus_kimberleyensis	6.77	7.03	13.55	5.66	11	10.81	7.62	11.28	7.03
Youngolepis_praecursor	3.26	1.52	8.41	3.37	6.45	5.54	3.26	3.46	22.01
			5.85
			7.78
			10.96
			5.67
			14.16
			18.21
			13.67
			4.17
			7.03
			1.52

## Sheet: Comments and variables
ENDOCAST MATRIX
Species name	TAXA
nasal capsules length	NAS_CAP_L
olfactory canals length	OLF_CAN_L
n.II _ olf. bifurcation	NII_ OLF_BIF
HF _ n.II	HF_NII
n.V _ HF	NV_HF
n.X _ n.V	NX_NV
height SCC	SCC_H
length SCC	SCC_L
width SCC (1 side)	SCC_W
utriculus height	UTR_H
utriculus length	UTR_L
sacculus height	SAC_H
sacculus length	SAC_L
depth hypophys. fossa	DEP_HYP_F
depth at n.II	D_NII
depth at n.V	D_NV
Angle of bifurcation (olf)	ANG_OLF
Normalisation coefficient	NOR_COEF
