# Supplementary material for: Morphometric analysis of lungfish endocasts elucidates early dipnoan palaeoneurological evolution
Source: eLife. 2022 Jul 12;11:e73461. doi: 10.7554/eLife.73461 (PMC9275822; doi:10.7554/eLife.73461)
Supplement: Source data 2. [file elife-73461-data2.xlsx]

## Sheet: Sheet1
	PC1	PC2
OLF_CAN_L	3.90871452964492	38.615473941885
NII_OLF_BIF	12.8190338507774	2.95321060779059
NX_NV	13.7258524975257	0.384765781283963
SCC_H	15.0637791496604	1.63287103451677
SCC_L	14.7101984577899	0.0654739593763119
SCC_W	13.1913661178275	2.40307733603611
D_NII	14.1587121086073	0.129328621976079
D_NV	12.0024872567159	0.545349858673664
ANG_OLF	0.419856031451009	53.2704488584616
Eigenvalues	6.287304970	1.542510485
Broken stick ratio	2.2224727907731	0.843377397080271
