# Supplementary material for: Morphometric analysis of lungfish endocasts elucidates early dipnoan palaeoneurological evolution
Source: eLife. 2022 Jul 12;11:e73461. doi: 10.7554/eLife.73461 (PMC9275822; doi:10.7554/eLife.73461)
Supplement: Source data 3. [file elife-73461-data3.xlsx]

## Sheet: Sheet1
	PC1	PC2	PC3
OLF_CAN_L	6.19257898312482	5.11351518701915	11.0933277785166
NII_OLF_BIF	6.53650722510801	6.28370837929922	15.3407382923295
HF_NII	2.10346819872544	27.2238051515513	7.85546099226729
NV_HF	4.41213391841752	7.05631113372514	8.26813866286623
NX_NV	6.10633204271916	4.25532128637556	17.2311054363316
SCC_H	11.693955374225	3.87196738188424	0.283037343673728
SCC_L	9.70543400332887	5.06259597385892	5.70234746078945
SCC_W	7.49595332826496	0.135289087515301	22.6180557098604
UTR_H	11.542249370531	3.67842678423097	1.44016175927601
UTR_L	11.7521181124951	0.0305219043958843	2.82585845600386
D_NII	11.6295307418901	0.129372315451955	1.10670681119906
D_NV	8.51014160689071	3.46494537872952	6.23505130436081
ANG_OLF	2.31959709427935	33.6942200359628	9.99252540888273E-06
Eigenvalues	7.1754922	2.1307062	1.9590148
Broken stick ratio	2.25634918676556	0.977328186162069	1.16598740020901
