# Supplementary material for: Morphometric analysis of lungfish endocasts elucidates early dipnoan palaeoneurological evolution
Source: eLife. 2022 Jul 12;11:e73461. doi: 10.7554/eLife.73461 (PMC9275822; doi:10.7554/eLife.73461)
Supplement: Source data 4. [file elife-73461-data4.xlsx]

## Sheet: Sheet1
	PC1	PC2
NAS_CAP_L	-9.12304565700371	3.50197351461193
OLF_CAN_L	-12.5869412418454	-2.34000416439431
NII_OLF_BIF	-2.29726112172633	2.67590309410671
HF_NII	-1.80545142068284	1.73969118393383
NV_HF	-3.40714957647348	0.939964956250186
NX_NV	-5.84453119712103	3.69818484109894
SCC_H	-2.3164201710458	1.86417078786349
SCC_L	-3.92701397790068	2.52306338953904
SCC_W	-3.55308468379225	2.36099630652991
UTR_H	-1.09737770042346	0.190740311106624
UTR_L	-2.19368311674824	-0.343527970736762
SAC_H	-2.17431951862735	0.74091639289003
SAC_L	-3.47399727038087	1.99327378409054
DEP_HYP_F	-7.92990482622676	1.89111321847817
D_NII	-4.05547885836305	2.76281142611485
D_NV	-4.1787615678232	1.60508371641683
ANG_OLF	6.35385678382898	11.457207942252
