# Supplementary material for: Morphometric analysis of lungfish endocasts elucidates early dipnoan palaeoneurological evolution
Source: eLife. 2022 Jul 12;11:e73461. doi: 10.7554/eLife.73461 (PMC9275822; doi:10.7554/eLife.73461)
Supplement: Source data 5. [file elife-73461-data5.xlsx]

## Sheet: Sheet1
	PC1	PC2	PC3
NAS_CAP_L	-0.91571243284403	0.202014606085418	-0.139886523884584
OLF_CAN_L	-0.570810507874322	0.537353074721915	0.554927422644786
NII_ OLF_BIF	-0.895638724998176	-0.121895301543346	-0.0952078495165962
HF_NII	-0.766506936235298	0.0869543060293004	-0.0627374576131092
NV_HF	-0.693737514306155	0.537652778293526	-0.685683999201239
NX_NV	-0.799490841201015	-0.59448909678447	0.442843409478173
SCC_H	-0.894543914462899	-0.31596363827758	0.36022919290729
SCC_L	-0.898312868632808	-0.306486190174807	0.471303226388392
SCC_W	-0.769248428582565	-0.185330774409471	0.19319608787735
UTR_H	-0.829844357194091	0.577095580353419	-0.178887986790639
UTR_L	-0.775941289191924	0.5839096968582	0.212374128585975
SAC_H	-0.963916017846113	-0.394610128734223	0.181512528234876
SAC_L	-0.855287666919181	-0.545249658155325	0.113423082259584
DEP_HYP_F	-0.907215651707604	0.401112000267712	-0.431051193205474
D_NII	-0.959390063858471	-0.126883261815644	-0.389953636001109
D_NV	-0.927252020184426	0.0929664982749334	-0.383850732885421
ANG_OLF	0.0629540008687756	-0.819620353318138	-0.518521272452808
Eigenvalues	11.795751635	2.253490039	1.154650430
Broken stick ratio	3.19535303661956	0.908381307668677	0.497446252517108
